# Supplementary material for: Complexity of the Relationship between Environmental Factors, Interspecific Competition, and Intrinsic Traits of the Species in Explaining the Invasive Success of Gobio lozanoi Doadrio & Madeira, 2004
Source: MDPI journal article supplement (doi:10.3390/w13213043), 2021-11-01
Supplement: s1 [file s1]

**Table S1.** Furcal length (cm), weight (g), condition factor (k) and glycogen (mg/g), protein (mg/g) and lipids (%) concentration of the individuals of *G. lozanoi* in Pego River.

| Pego River | Specimen | Furcal<br>length<br>(cm) | Weight<br>(g) | Condition<br>factor (K) | Proteins<br>(mg/g) | Glycogen<br>(mg/g) | Lipids (%) |
|------------|----------|--------------------------|---------------|-------------------------|--------------------|--------------------|------------|
|            | 1        | 8.1                      | 7.01          | 1.32                    | 39.35              | 0.13               | 3.9        |
|            | 2        | 8.8                      | 10.65         | 1.56                    | 44.04              | 0.10               | 2.1        |
|            | 3        | 6.9                      | 3.62          | 1.10                    | 43.64              | 0.09               | 5.8        |
|            | 4        | 6.2                      | 2.57          | 1.08                    | 59.12              | 0.05               | 8.3        |
|            | 5        | 8.9                      | 9.74          | 1.38                    | 42.01              | 0.03               | 1.7        |
|            | 6        | 6.7                      | 3.50          | 1.16                    | 28.88              | 0.03               | 3.0        |
|            | 7        | 7.0                      | 4.75          | 1.38                    | 48.64              | 0.05               | 2.6        |
|            | 8        | 5.4                      | 1.96          | 1.24                    | 35.76              | 0.05               | 6.4        |
|            | 9        | 8.5                      | 8.25          | 1.34                    | 30.42              | 0.10               | 2.1        |
|            | 10       | 9.8                      | 12.00         | 1.27                    | 41.97              | 0.12               | 1.8        |
|            | 11       | 9.3                      | 10.84         | 1.35                    | 45.59              | 0.04               | 2.9        |
|            | 12       | 6.5                      | 3.78          | 1.38                    | 43.50              | 0.10               | 3.5        |
|            | 13       | 5.2                      | 1.78          | 1.27                    | 41.15              | 0.05               | 3.7        |
|            | 14       | 3.3                      | 0.48          | 1.34                    | 75.82              | 0.17               | 11.1       |
|            | 15       | 5.4                      | 1.95          | 1.24                    | 40.26              | 0.04               | 3.6        |
|            | 16       | 8.2                      | 6.86          | 1.24                    | 41.91              | 0.03               | 2.0        |
|            | 17       | 4.0                      | 0.79          | 1.23                    | 47.37              | 0.11               | 6.3        |
|            | 18       | 6.4                      | 3.24          | 1.24                    | 43.38              | 0.04               | 3.0        |
|            | 19       | 8.8                      | 9.46          | 1.39                    | 39.90              | 0.06               | 1.4        |
|            | 20       | 6.0                      | 3.09          | 1.43                    | 39.09              | 0.04               | 3.7        |
|            | 21       | 8.2                      | 7.29          | 1.32                    | 39.93              | 0.07               | 2.1        |
|            | 22       | 10.7                     | 16.36         | 1.34                    | 42.53              | 0.07               | 1.7        |
|            | 23       | 5.7                      | 2.37          | 1.28                    | 43.72              | 0.09               | 6.2        |
|            | 24       | 5.9                      | 3.03          | 1.48                    | 43.19              | 0.08               | 4.8        |
|            | 25       | 8.6                      | 5.70          | 0.90                    | 40.56              | 0.05               | 2.0        |
|            | 26       | 4.5                      | 0.97          | 1.06                    | 52.46              | 0.06               | 13.9       |
|            | 27       | 3.2                      | 0.40          | 1.22                    | 43.64              | 0.12               | 28.9       |
|            | 28       | 5.8                      | 2.29          | 1.17                    | 38.30              | 0.05               | 3.9        |
|            | 29       | 10.0                     | 14.40         | 1.44                    | 42.27              | 0.04               | 1.3        |
| 30         | 4.4      | 0.94                     | 1.10          | 60.25                   | 0.12               | 19.1               |            |

**Table S2.** Furcal length (cm), weight (g), condition factor (k) and glycogen (mg/g), protein (mg/g) and lipids (%) concentration of the individuals of *G. lozanoi* in Caselas River.

| Specimen | Furcal length (cm) | Weight (g) | Condition factor (K) | Proteins (mg/g) | Glycogen (mg/g) | Lipids (%) |
|----------|--------------------|------------|----------------------|-----------------|-----------------|------------|
|----------|--------------------|------------|----------------------|-----------------|-----------------|------------|

Caselas River

|    |      |       |      |       |      |     |
|----|------|-------|------|-------|------|-----|
| 1  | 11.4 | 17.93 | 1.21 | 45.69 | 0.07 | 1.1 |
| 2  | 10.1 | 12.56 | 1.22 | 42.19 | 0.05 | 2.0 |
| 3  | 8.8  | 10.63 | 1.56 | 74.19 | 0.07 | 1.8 |
| 4  | 9.2  | 12.03 | 1.54 | 78.62 | 0.08 | 1.8 |
| 5  | 9.8  | 11.02 | 1.17 | 40.28 | 0.06 | 1.3 |
| 6  | 8.4  | 8.13  | 1.37 | 77.47 | 0.08 | 2.2 |
| 7  | 10.8 | 15.25 | 1.21 | 43.00 | 0.08 | 1.4 |
| 8  | 9.9  | 12.55 | 1.29 | 59.99 | 0.07 | 2.9 |
| 9  | 9.4  | 11.57 | 1.39 | 46.02 | 0.07 | 1.7 |
| 10 | 7.5  | 5.63  | 1.33 | 45.76 | 0.05 | 2.9 |
| 11 | 9.5  | 10.87 | 1.27 | 53.19 | 0.10 | 2.8 |
| 12 | 9.8  | 11.50 | 1.22 | 68.63 | 0.07 | 1.8 |
| 13 | 6.0  | 2.54  | 1.18 | 56.45 | 0.17 | 2.4 |
| 14 | 9.2  | 10.29 | 1.32 | 62.41 | 0.06 | 2.2 |
| 15 | 10.8 | 19.43 | 1.54 | 54.43 | 0.06 | 1.6 |
| 16 | 7.4  | 5.29  | 1.31 | 62.46 | 0.06 | 2.1 |
| 17 | 9.8  | 10.95 | 1.16 | 70.43 | 0.12 | 1.2 |
| 18 | 9.5  | 10.87 | 1.27 | 58.67 | 0.07 | 2.0 |
| 19 | 8.2  | 8.29  | 1.50 | 56.34 | 0.06 | 2.4 |
| 20 | 6.6  | 3.04  | 1.06 | 58.67 | 0.13 | 2.6 |
| 21 | 9.6  | 10.75 | 1.22 | 48.36 | 0.08 | 2.0 |
| 22 | 9.1  | 8.82  | 1.17 | 59.76 | 0.08 | 2.3 |
| 23 | 8.9  | 9.18  | 1.30 | 63.64 | 0.07 | 2.0 |
| 24 | 10.0 | 12.28 | 1.23 | 62.50 | 0.07 | 1.9 |
| 25 | 7.0  | 4.44  | 1.29 | 56.80 | 0.08 | 1.7 |
| 26 | 10.8 | 16.31 | 1.29 | 71.02 | 0.09 | 1.6 |
| 27 | 8.6  | 8.04  | 1.26 | 56.52 | 0.08 | 2.7 |
| 28 | 8.8  | 8.51  | 1.25 | 67.53 | 0.11 | 2.6 |
| 29 | 9.2  | 10.10 | 1.30 | 70.65 | 0.07 | 2.6 |
| 30 | 9.4  | 10.52 | 1.27 | 55.91 | 0.07 | 1.8 |
